# Supplementary material
Source: PubMed Central journal article supplement (PMC1924477)

### GST-M1

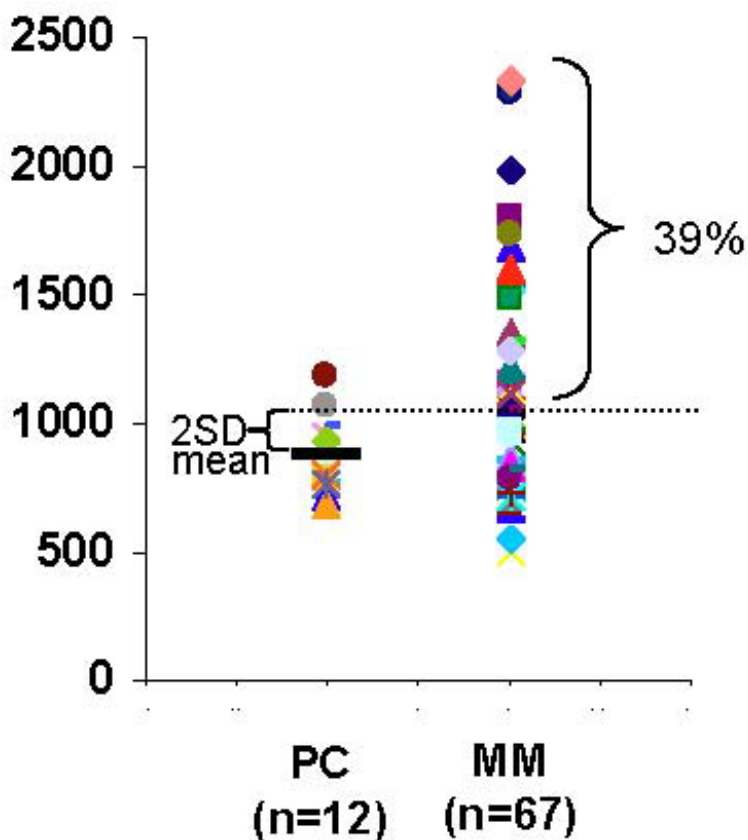

### GST-P1

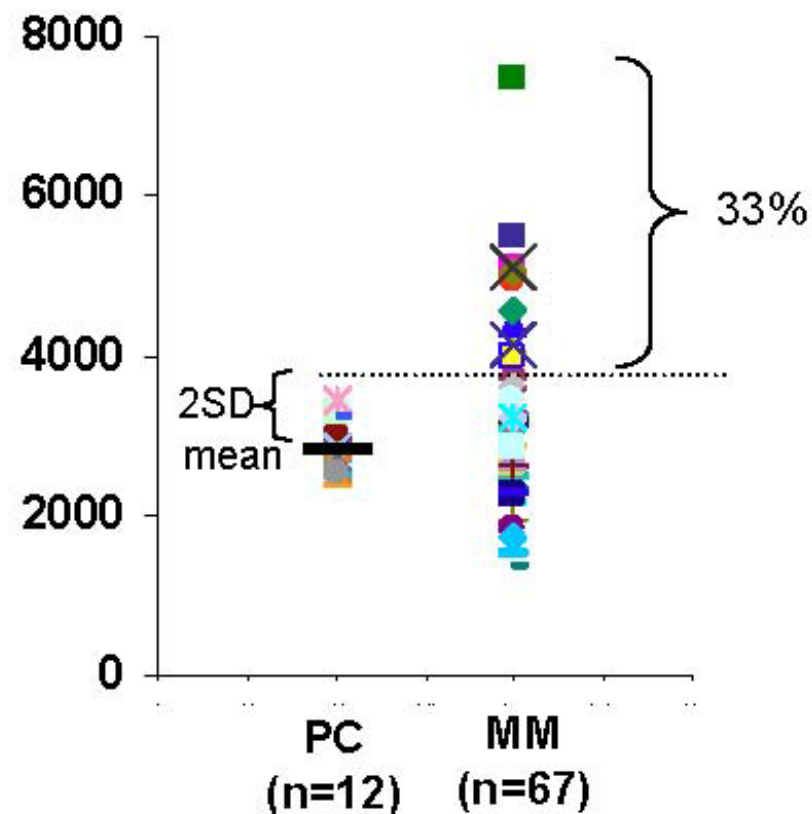

% of MM cells that have expression values  $\geq$  PC (mean + 2SD) are shown

Supplement: blood_blood-2006-10-052845_2.pdf [file blood_blood-2006-10-052845_2.pdf]
